# Supplementary material
Source: publisher figshare collection journal article supplement (https://acs.figshare.com/ndownloader/files/4383061)
Supplement: Supplementary file 1 [file 4383061]

## Supporting Information

### Site Selective Lanthanide Doping in a Nonanuclear Yttrium(III) Cluster Revealed by Crystal Structures and Luminescence Spectra.

*François Baril-Robert<sup>a</sup>, Sarah Petit<sup>b,§</sup>, Guillaume Pilet<sup>b</sup>, Guillaume Chastanet<sup>b,‡</sup>,*

*Christian Reber<sup>a,\*</sup>, Dominique Luneau<sup>b,\*</sup>*

<sup>a</sup> Département de chimie, Université de Montréal, Montréal, Québec H3C 3J7, Canada

<sup>b</sup> Université Claude Bernard Lyon 1, Laboratoire des Multimatériaux et Interfaces (UMR 5615), Campus de la Doua, 69622 Villeurbanne cedex, France

Table S1: Amount of lanthanide ion per doped cluster from XRD single crystal structure determinations and EDX analysis. The percentages given are for Ln / (Y + Ln) ratios.

| Clusters | Simplified formula <sup>b</sup>         | Ln (%) <sup>a</sup> |                                        |           |
|----------|-----------------------------------------|---------------------|----------------------------------------|-----------|
|          |                                         | XRD <sup>b</sup>    | EDX<br>on single-crystals <sup>c</sup> | on powder |
| (1)      | [Y <sub>7.34</sub> Yb <sub>1.66</sub> ] | 18.4                | 17.6                                   | 15.9      |
| (2)      | [Y <sub>7.02</sub> Dy <sub>1.98</sub> ] | 22.0                | 18.9                                   | 20.0      |
| (3)      | [Y <sub>7.05</sub> Tb <sub>1.95</sub> ] | 21.7                | 21.0                                   | 19.7      |
| (4)      | [Y <sub>8.77</sub> Pr <sub>0.23</sub> ] | 2.6                 | (*)                                    | (*)       |
| (5)      | [Y <sub>8.60</sub> Eu <sub>0.40</sub> ] | 4.4                 | (*)                                    | (*)       |
| (6)      | [Y <sub>8.02</sub> Eu <sub>0.98</sub> ] | 10.9                | 8.9                                    | 11.2      |
| (7)      | [Y <sub>6.08</sub> Eu <sub>2.92</sub> ] | 32.4                | 29.9                                   | 31.5      |
| (8)      | [Y <sub>4.65</sub> Eu <sub>4.35</sub> ] | 48.3                | 49.1                                   | 50.9      |

(a) Ln + Y=100%

(b) From XRD single crystal structure refinement of the site occupation.

(c) Average data collected on 10 single-crystals.

(\*) due to the very low percentage of dopant Ln(III) element, EDS results were not significant and have not been included in the Table.

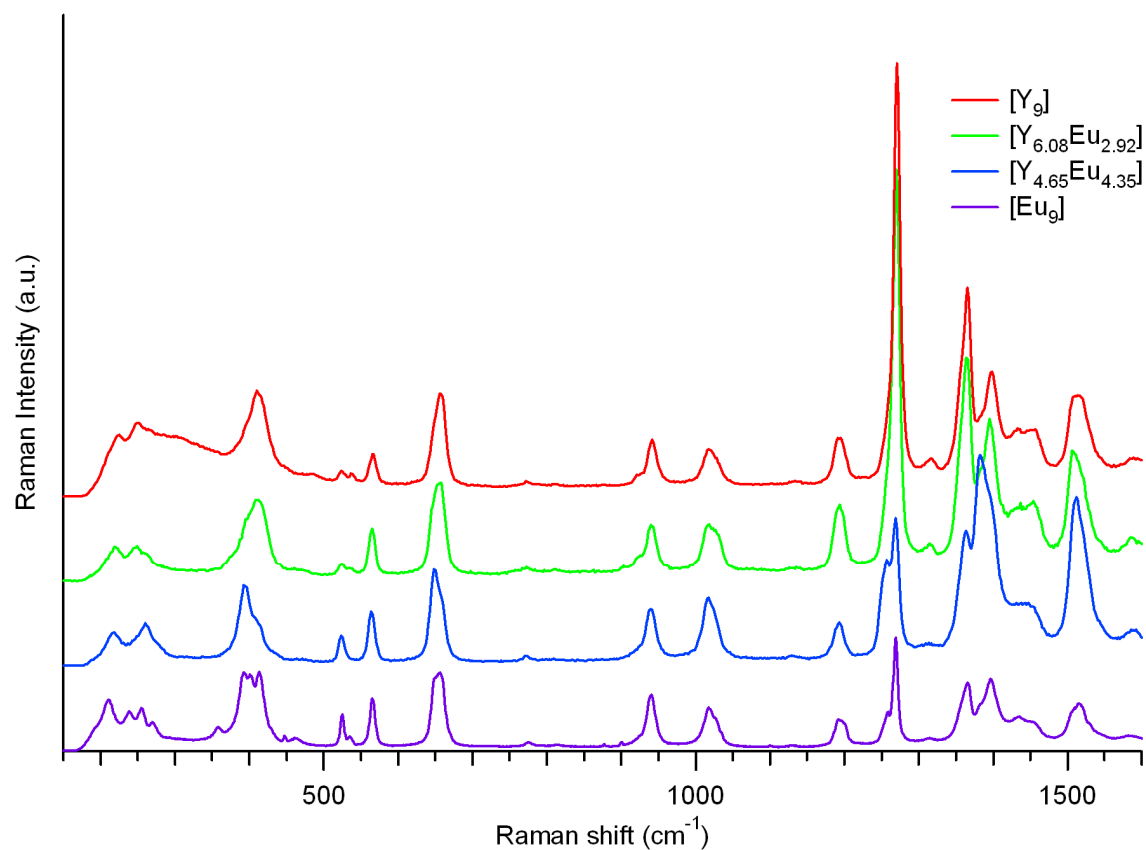

Figure S1: Raman spectra of [Y<sub>9</sub>], [Y<sub>6.08</sub>Eu<sub>2.92</sub>], [Y<sub>4.65</sub>Eu<sub>4.35</sub>] and [Eu<sub>9</sub>]. Raman spectra of the top three sample were acquired using a 488 nm excitation laser while a 785nm excitation source was used to obtain the [Eu<sub>9</sub>] spectrum.
